# Supplementary material for: Indisulam targets RNA splicing and metabolism to serve as a therapeutic strategy for high-risk neuroblastoma
Source: PubMed Central journal article supplement (PMC8927615; doi:10.1038/s41467-022-28907-3), 2022-03-16
Supplement: 41467_2022_28907_MOESM3_ESM.pdf [file 41467_2022_28907_MOESM3_ESM.pdf]

## **Description of Additional Supplementary Files**

File Name: Supplementary Data 1

Description: Pathway enrichment analysis on RNA splicing and proteomics analysis

File Name: Supplementary Data 2

Description: <sup>13</sup>Cisotope labelling data in DCAF15 WT and KO KELLY cells

File Name: Supplementary Data 3

Description: LC-MS metabolomic analysis in DCAF15 WT and KO KELLY cells

File Name: Supplementary Data 4

Description: LC-MS metabolomic analysis in IMR-32 xenograft tissue
